# Supplementary material
Source: PubMed Central journal article supplement (PMC9214651)
Supplement: NIHMS1814027-supplement-Survey_questions.pdf [file NIHMS1814027-supplement-Survey_questions.pdf]

## Demographic Questions

Title of Research Project: **Perspectives on Non-medical DNA Applications**

### Principal Investigator:

Sara H. Katsanis, MS  
Associate in Research, Duke University Institute for Genome Science & Policy  
236 North Building, DUMC Box 90141  
Office: 919-668-7499  
Email: sara.katsanis@duke.edu

- A. **Purpose of Study:** This study aims to understand: (1) general views and attitudes toward genetic testing, (2) perspectives on the use of DNA in law enforcement, and (3) perspectives on the use of DNA in missing persons and human trafficking contexts. We are surveying 360 individuals.
- B. **Procedures to be Followed:** You will be asked to answer a series of questions on an online survey. For each question, you should select the option that best reflects your opinion or answer. Space will be provided for you to share additional information.
- C. **Duration/Time:** This online survey should take approximately 30-50 minutes to complete.
- D. **Foreseeable Risks:** This research poses a minimal risk to you. The probability and magnitude of physical or psychological harm or discomfort anticipated in this research are not greater than those ordinarily encountered in daily life or during the performance of routine physical or psychological examinations or tests.
- E. **Compensation for your Contribution to Research:** You will not receive compensation for participating in the survey. However, you may opt to enter a drawing for a Target gift card of \$50. If you are selected for the gift card (odds are 1:60), you will be asked to provide your contact information and social security number to receive the gift card.
- F. **Statement of Confidentiality:** This survey is confidential and does not collect

your name, Internet address or contact information. The limited demographic information that is requested is for study purposes and will not be used to identify you or your responses. In the event of any publication or presentation resulting from this research, no personally identifiable information will be published. Survey responses are collected, encrypted for security, and stored via Qualtrics software. Your confidentiality will be kept to the degree permitted by the technology used. No guarantees can be made regarding the interception of data sent via the Internet by any third parties.

**G. Right to Ask Questions:** Please contact the principal investigator, Sara Katsanis, with any questions or concerns about this study.

**H. Voluntary Participation:** Your decision to be in this research study is voluntary. You can stop at any time. You do not have to answer questions you do not want to answer. You are not required to enter the gift card drawing.

**I. Eligibility Criteria:** You must be at least 18 years of age to participate in this study.

**J. Implied Consent and Waiver of Signed Documentation of Consent:** Your completion of this online survey implies that you have read the information in this form and that you have had the right and opportunity to ask the investigators any questions or discuss any concerns about participation in this research study. Your completion of this online survey also indicates you agree to waive signed documentation of your voluntary consent to participate in this research study. Please print this page and keep it for your records.

Do you agree to participate in this study?

- Yes. I have read the information on this page, I am familiar with its contents, and I have had the opportunity to ask any questions. I attest that I am at least 18 years of age. I agree to participate in this survey research and understand that I may quit the survey at any time. I agree to waive my right to signed documentation of my consent and understand I should print a copy of this page for my records.
- No

First we will ask for some information about you.

How old are you? (in years)

### What is your sex?

- Male
- Female
- Decline to respond

### With which group do you most closely identify?

- American Indian or Native Alaskan
- Black, African, or African American
- East Asian
- Hispanic or Latino
- Native Hawaiian or other Pacific Islander
- South Asian
- Southeast Asian
- White, European, or European American
- Decline to respond
- Other

### Which description best identifies you?

- U.S. citizen
- Legal U.S. resident
- Undocumented immigrant in the U.S.
- Non-U.S. resident
- Decline to respond

What is your native language?

- English
- Spanish
- Other
- Decline to respond

What language do you usually speak with your friends?

- English
- Spanish
- Other
- Decline to respond

What is your highest level of education?

- Some elementary school
- Some middle school
- Some high school
- Completed high school
- Some college
- Completed college
- Graduate or professional school
- Decline to respond

## Victims Advocates Questions vs. Students

Are you currently a student?

-

Yes

No

Please indicate your current level in school

Undergraduate

Master's student

Doctoral student

Other

Have you volunteered or worked at an organization that advocates for victims of abuse or human trafficking?

Yes

No

Which position best describes your role as a victims' advocate?

Volunteer

Lawyer

Social worker

Psychologist

Sociologist

Historian

Basic scientist

Health care provider

Translator

Other

Decline to respond

How long have you been involved in victims' advocacy? (in years)

How would you best describe your role as a victims' advocate?

- Full-time career
- Part-time career
- Mostly volunteer
- Entirely volunteer

In your education, did you have any college-level (or higher) lessons on genetics or DNA?

- Yes
- No
- I don't know

Have you ever seen a genetics specialist, such as a genetic counselor or medical geneticist?

- Yes
- No
- I don't know
- Decline to respond

## General questions on human trafficking

Next we will ask for your opinion on some aspects of human trafficking, sex work, law enforcement, and uses of DNA.

Do you or does your victims' advocacy organization work directly with human trafficking victims?

- Yes
- No
- I don't know

Have you ever worked directly with human trafficking victims?

- Yes
- No
- I don't know
- Decline to respond

Which of the following do you consider to be examples of human trafficking?

|                                                 | Always                | Most of the Time      | Sometimes             | Rarely                | Never                 | I don't know          |
|-------------------------------------------------|-----------------------|-----------------------|-----------------------|-----------------------|-----------------------|-----------------------|
| Child prostitution                              | <input type="radio"/> |
| Sex work through a third party (such as a pimp) | <input type="radio"/> |
| Child pornography                               | <input type="radio"/> |
| Consensual sex work                             | <input type="radio"/> |

Which of the following do you consider to be examples of human trafficking?

|  | Most of the | I don't |
|--|-------------|---------|
|--|-------------|---------|

|                                                                     | Always                | Time                  | Sometimes             | Rarely                | Never                 | know                  |
|---------------------------------------------------------------------|-----------------------|-----------------------|-----------------------|-----------------------|-----------------------|-----------------------|
| Child labor                                                         | <input type="radio"/> |
| Payment for smuggling a person across borders                       | <input type="radio"/> |
| Debt bondage for smuggling a person across borders for exploitation | <input type="radio"/> |
| Forced or coerced use of a child for military service               | <input type="radio"/> |
| Forced or bonded labor                                              | <input type="radio"/> |

Which of the following do you consider to be examples of human trafficking?

|                                                                                    | Always                | Most of the Time      | Sometimes             | Rarely                | Never                 | I don't know          |
|------------------------------------------------------------------------------------|-----------------------|-----------------------|-----------------------|-----------------------|-----------------------|-----------------------|
| Paying or coercing a parent to give up a child for adoption                        | <input type="radio"/> |
| Paying or coercing a woman to have a child to sell for adoption (e.g., baby farms) | <input type="radio"/> |
| Selling a child for adoption                                                       | <input type="radio"/> |

Which of the following do you consider to be examples of human trafficking?

|                                                                                    | Always                | Most of the Time      | Sometimes             | Rarely                | Never                 | I don't know          |
|------------------------------------------------------------------------------------|-----------------------|-----------------------|-----------------------|-----------------------|-----------------------|-----------------------|
| Selling another person's organs or body parts                                      | <input type="radio"/> |
| Selling a person's own organs or body parts                                        | <input type="radio"/> |
| Forced or coerced collection of a person's biological specimens for government use | <input type="radio"/> |
| Forced or coerced collection of a person's biological specimens for profit         | <input type="radio"/> |
| Selling a person's own reproductive samples (eggs, sperm) across borders           | <input type="radio"/> |



Do you or does your victims' advocacy organization work with international adoptions?

- Yes
- No
- I don't know
- Decline to respond

Agree or disagree with the following statements:

|                                                             | Strongly Agree        | Agree                 | Neither Agree nor Disagree | Disagree              | Strongly Disagree     |
|-------------------------------------------------------------|-----------------------|-----------------------|----------------------------|-----------------------|-----------------------|
| International adoption is good for families                 | <input type="radio"/> | <input type="radio"/> | <input type="radio"/>      | <input type="radio"/> | <input type="radio"/> |
| Children sold for adoption are victims of human trafficking | <input type="radio"/> | <input type="radio"/> | <input type="radio"/>      | <input type="radio"/> | <input type="radio"/> |
| International adoption is good for the originating country  | <input type="radio"/> | <input type="radio"/> | <input type="radio"/>      | <input type="radio"/> | <input type="radio"/> |
| International adoption is good for the adopted child        | <input type="radio"/> | <input type="radio"/> | <input type="radio"/>      | <input type="radio"/> | <input type="radio"/> |

Do you or does your victims' advocacy organization work with rehabilitation of sex trafficking victims or sex workers?

- Yes
- No
- I don't know
- Decline to respond

Agree or disagree with the following statements:

|  | Strongly Agree        | Agree                 | Neither Agree nor Disagree | Disagree              | Strongly disagree     |
|--|-----------------------|-----------------------|----------------------------|-----------------------|-----------------------|
|  | <input type="radio"/> | <input type="radio"/> | <input type="radio"/>      | <input type="radio"/> | <input type="radio"/> |

|                                                          |                       |                       |                       |                       |                       |
|----------------------------------------------------------|-----------------------|-----------------------|-----------------------|-----------------------|-----------------------|
| Sex workers feel pressured to continue as a sex worker   | <input type="radio"/> |
| Working in the sex trade can be a choice                 | <input type="radio"/> |
| Sex workers want to continue to work in the sex industry | <input type="radio"/> |
| Sex workers want to pursue a career outside of sex trade | <input type="radio"/> |

**Agree or disagree with the following statements:**

|                                                         | Strongly Agree        | Agree                 | Neither Agree nor Disagree | Disagree              | Strongly Disagree     |
|---------------------------------------------------------|-----------------------|-----------------------|----------------------------|-----------------------|-----------------------|
| Adult sex workers are victims of human trafficking      | <input type="radio"/> | <input type="radio"/> | <input type="radio"/>      | <input type="radio"/> | <input type="radio"/> |
| Minor sex workers are victims of human trafficking      | <input type="radio"/> | <input type="radio"/> | <input type="radio"/>      | <input type="radio"/> | <input type="radio"/> |
| Consensual sex workers are victims of human trafficking | <input type="radio"/> | <input type="radio"/> | <input type="radio"/>      | <input type="radio"/> | <input type="radio"/> |

**Agree or disagree with the following statements:**

|                                                                                      | Strongly Agree        | Agree                 | Neither Agree nor Disagree | Disagree              | Strongly Disagree     |
|--------------------------------------------------------------------------------------|-----------------------|-----------------------|----------------------------|-----------------------|-----------------------|
| Most people would date a person who has been a sex worker                            | <input type="radio"/> | <input type="radio"/> | <input type="radio"/>      | <input type="radio"/> | <input type="radio"/> |
| Most people would willingly accept a sex worker as a close friend                    | <input type="radio"/> | <input type="radio"/> | <input type="radio"/>      | <input type="radio"/> | <input type="radio"/> |
| Most employers will hire a sex worker if he or she is qualified for the job          | <input type="radio"/> | <input type="radio"/> | <input type="radio"/>      | <input type="radio"/> | <input type="radio"/> |
| Most people believe that a sex worker is just as trustworthy as the average person   | <input type="radio"/> | <input type="radio"/> | <input type="radio"/>      | <input type="radio"/> | <input type="radio"/> |
| Most people in my community would treat a sex worker just as they would treat anyone | <input type="radio"/> | <input type="radio"/> | <input type="radio"/>      | <input type="radio"/> | <input type="radio"/> |

**Alternate "Sex Workers" with "Trafficking victims"**

Agree or disagree with the following statements:

|                                                                          | Strongly Agree        | Agree                 | Neither Agree nor Disagree | Disagree              | Strongly Disagree     |
|--------------------------------------------------------------------------|-----------------------|-----------------------|----------------------------|-----------------------|-----------------------|
| I trust the police to protect sex workers that are not in police custody | <input type="radio"/> | <input type="radio"/> | <input type="radio"/>      | <input type="radio"/> | <input type="radio"/> |
| I trust social workers to assist sex workers                             | <input type="radio"/> | <input type="radio"/> | <input type="radio"/>      | <input type="radio"/> | <input type="radio"/> |
| I trust a lawyer to assist sex workers                                   | <input type="radio"/> | <input type="radio"/> | <input type="radio"/>      | <input type="radio"/> | <input type="radio"/> |
| I trust the police to protect sex workers when they are in custody       | <input type="radio"/> | <input type="radio"/> | <input type="radio"/>      | <input type="radio"/> | <input type="radio"/> |
| I trust a health care provider to assist sex workers                     | <input type="radio"/> | <input type="radio"/> | <input type="radio"/>      | <input type="radio"/> | <input type="radio"/> |

Agree or disagree with the following statements:

|                                                                                      | Strongly Agree        | Agree                 | Neither Agree nor Disagree | Disagree              | Strongly Disagree     |
|--------------------------------------------------------------------------------------|-----------------------|-----------------------|----------------------------|-----------------------|-----------------------|
| I trust social workers to assist sex trafficking victims                             | <input type="radio"/> | <input type="radio"/> | <input type="radio"/>      | <input type="radio"/> | <input type="radio"/> |
| I trust a health care provider to assist sex trafficking victims                     | <input type="radio"/> | <input type="radio"/> | <input type="radio"/>      | <input type="radio"/> | <input type="radio"/> |
| I trust the police to protect sex trafficking victims that are not in police custody | <input type="radio"/> | <input type="radio"/> | <input type="radio"/>      | <input type="radio"/> | <input type="radio"/> |
| I trust a lawyer to assist sex trafficking victims                                   | <input type="radio"/> | <input type="radio"/> | <input type="radio"/>      | <input type="radio"/> | <input type="radio"/> |
| I trust the police to protect sex trafficking victims when they are in custody       | <input type="radio"/> | <input type="radio"/> | <input type="radio"/>      | <input type="radio"/> | <input type="radio"/> |

## Questions about DNA & Privacy

DNA is often used by officials as an identity tool.

A DNA specimen may be collected by a person and a "DNA profile" created from that sample, which consists of data points that describe molecular traits that are unique to a person (except for identical twins).

A DNA profile does not relay medical information.

Are you familiar with law enforcement's use of DNA to investigate crimes in the U.S.?

|                                                                                            | Very familiar         | Somewhat familiar     | Not at all familiar   |
|--------------------------------------------------------------------------------------------|-----------------------|-----------------------|-----------------------|
| I am familiar with law enforcement use of DNA                                              | <input type="radio"/> | <input type="radio"/> | <input type="radio"/> |
| I am familiar with the U.S. law enforcement DNA database CODIS (COMbined DNA Index System) | <input type="radio"/> | <input type="radio"/> | <input type="radio"/> |

Agree or disagree with the following statements:

|                                                            | Strongly Agree        | Agree                 | Neither Agree nor Disagree | Disagree              | Strongly Disagree     |
|------------------------------------------------------------|-----------------------|-----------------------|----------------------------|-----------------------|-----------------------|
| DNA is a valuable law enforcement tool to identify victims | <input type="radio"/> | <input type="radio"/> | <input type="radio"/>      | <input type="radio"/> | <input type="radio"/> |
| With more people in CODIS, more crimes will be solved      | <input type="radio"/> | <input type="radio"/> | <input type="radio"/>      | <input type="radio"/> | <input type="radio"/> |
| DNA is a valuable law enforcement tool to solve crimes     | <input type="radio"/> | <input type="radio"/> | <input type="radio"/>      | <input type="radio"/> | <input type="radio"/> |

Agree or disagree with the following statements:

|                                                                                                                           | Strongly Agree        | Agree                 | Neither Agree nor Disagree | Disagree              | Strongly Disagree     |
|---------------------------------------------------------------------------------------------------------------------------|-----------------------|-----------------------|----------------------------|-----------------------|-----------------------|
| I trust law enforcement to keep my DNA profile private                                                                    | <input type="radio"/> | <input type="radio"/> | <input type="radio"/>      | <input type="radio"/> | <input type="radio"/> |
| If I were asked to participate in a law enforcement DNA database, I would fear someone will plant my DNA at a crime scene | <input type="radio"/> | <input type="radio"/> | <input type="radio"/>      | <input type="radio"/> | <input type="radio"/> |
| I do not worry about giving my DNA to law enforcement since I will not commit a crime                                     | <input type="radio"/> | <input type="radio"/> | <input type="radio"/>      | <input type="radio"/> | <input type="radio"/> |
| I trust a non-governmental organization (NGO) to keep my DNA profile private                                              | <input type="radio"/> | <input type="radio"/> | <input type="radio"/>      | <input type="radio"/> | <input type="radio"/> |

Agree or disagree with the following statements:

|                                                                                                   | Strongly Agree        | Agree                 | Neither Agree nor Disagree | Disagree              | Strongly Disagree     |
|---------------------------------------------------------------------------------------------------|-----------------------|-----------------------|----------------------------|-----------------------|-----------------------|
| DNA identity profiles (without any medical implications) should be subject to privacy protections | <input type="radio"/> | <input type="radio"/> | <input type="radio"/>      | <input type="radio"/> | <input type="radio"/> |
| Genetic information is inherently private                                                         | <input type="radio"/> | <input type="radio"/> | <input type="radio"/>      | <input type="radio"/> | <input type="radio"/> |
| DNA samples should be subject to privacy protections                                              | <input type="radio"/> | <input type="radio"/> | <input type="radio"/>      | <input type="radio"/> | <input type="radio"/> |

## Scenario Query

Finally, we would like to present scenarios where DNA could be used to address human trafficking.

Please indicate which scenarios you would like to consider:

- Use of DNA in international adoptions contexts
- Use of DNA in child soldier contexts
- Use of DNA for identifying sex trafficking victims

## Adoption Scenario

In Guatemala, children have been sold for purposes of international adoption, prompting closure of several adoption programs and resulting in an abundance of orphans. DNA samples from children being considered for adoption and residing in orphanages may be collected for comparison to samples collected from families in villages with reported missing children.

The program would be intended to assist with identification of stolen children before they are placed for international adoption.

If such a program were to be offered to a child in a Guatemalan orphanage, would you recommend s/he provide DNA?

- Definitely yes
- Probably yes
- Probably not
- Definitely not

If such a program were to be offered to a family from a Guatemalan village with missing children, would you recommend a family member provide DNA?

- Definitely yes
- Probably yes
- Probably not
- Definitely not

Who do you see as the primary intended beneficiary of this program?

- The Guatemalan government
- U.S. or other governments
- The village in Guatemala
- Families in Guatemala
- Families adopting from Guatemala
- Children from Guatemala
- Other

What concerns would you have about participation?

What would motivate you to encourage or discourage participation?

If such a program were to be offered, who would you trust to **HOLD** the DNA specimens and **USE** the DNA profiles (only relaying identity)?

|                                                                                | HOLD the DNA specimens |                       |                       | USE the DNA profiles  |                       |                       |
|--------------------------------------------------------------------------------|------------------------|-----------------------|-----------------------|-----------------------|-----------------------|-----------------------|
|                                                                                | Yes                    | Maybe                 | No                    | Yes                   | Maybe                 | No                    |
| Law enforcement in Guatemala (e.g., police, crime laboratory)                  | <input type="radio"/>  | <input type="radio"/> | <input type="radio"/> | <input type="radio"/> | <input type="radio"/> | <input type="radio"/> |
| Government organization outside of Guatemala (e.g., US-based authority)        | <input type="radio"/>  | <input type="radio"/> | <input type="radio"/> | <input type="radio"/> | <input type="radio"/> | <input type="radio"/> |
| Non-Governmental Organization (NGO, e.g., victims' advocacy group, charity)    | <input type="radio"/>  | <input type="radio"/> | <input type="radio"/> | <input type="radio"/> | <input type="radio"/> | <input type="radio"/> |
| Academic center (university laboratory, hospital)                              | <input type="radio"/>  | <input type="radio"/> | <input type="radio"/> | <input type="radio"/> | <input type="radio"/> | <input type="radio"/> |
| Government organization in Guatemala (e.g., national missing persons database) | <input type="radio"/>  | <input type="radio"/> | <input type="radio"/> | <input type="radio"/> | <input type="radio"/> | <input type="radio"/> |

To what extent do you agree or disagree with the following statements with regard to the discussed DNA program?

|                                                                                                                   | Strongly Agree        | Agree                 | Neither Agree nor Disagree | Disagree              | Strongly Disagree     |
|-------------------------------------------------------------------------------------------------------------------|-----------------------|-----------------------|----------------------------|-----------------------|-----------------------|
| I trust that a child's DNA would be protected from misuse                                                         | <input type="radio"/> | <input type="radio"/> | <input type="radio"/>      | <input type="radio"/> | <input type="radio"/> |
| DNA would be used to reunite children with families who offered those children up for adoption in the first place | <input type="radio"/> | <input type="radio"/> | <input type="radio"/>      | <input type="radio"/> | <input type="radio"/> |
| It is my duty to encourage participation in order for human trafficking victims to be identified                  | <input type="radio"/> | <input type="radio"/> | <input type="radio"/>      | <input type="radio"/> | <input type="radio"/> |
| I fear that the DNA would be used against the victim or family                                                    | <input type="radio"/> | <input type="radio"/> | <input type="radio"/>      | <input type="radio"/> | <input type="radio"/> |

## Child Soldier Scenario

In Sierra Leone, victims' advocates are recovering groups of trafficked child soldiers and attempting to identify the children and their families for reunification. DNA samples from children may be collected for comparison to samples collected from families in villages with missing children.

The program would be intended to assist with rapid and reliable identification of human trafficking victims.

If such a program were to be offered to a recovered child soldier in Sierra Leone, would you recommend s/he provide DNA?

- Definitely yes
- Probably yes
- Probably not
- Definitely not

If such a program were to be offered to a family from a village in Sierra Leone with reported missing children, would you recommend a family member provide DNA?

- Definitely yes
- Probably yes
- Probably not
- Definitely not

Who do you see as the primary intended beneficiary of this program?

- The government in Sierra Leone
- U.S. or other governments
- The village in Sierra Leone



- Families in Sierra Leone
- Children from Sierra Leone
- Other

What concerns would you have about participation?

What would motivate you to encourage or discourage participation?

If such a program were to be offered, who would you trust to **HOLD** the DNA specimens and **USE** the DNA profiles (only relaying identity)?

|                                                                                   | HOLD the DNA specimens |                       |                       | USE the DNA profiles  |                       |                       |
|-----------------------------------------------------------------------------------|------------------------|-----------------------|-----------------------|-----------------------|-----------------------|-----------------------|
|                                                                                   | Yes                    | Maybe                 | No                    | Yes                   | Maybe                 | No                    |
| Law enforcement in Sierra Leone (e.g., police, crime laboratory)                  | <input type="radio"/>  | <input type="radio"/> | <input type="radio"/> | <input type="radio"/> | <input type="radio"/> | <input type="radio"/> |
| Government organization in Sierra Leone (e.g., national missing persons database) | <input type="radio"/>  | <input type="radio"/> | <input type="radio"/> | <input type="radio"/> | <input type="radio"/> | <input type="radio"/> |
| Government organization outside of Sierra Leone (e.g., US-based authority)        | <input type="radio"/>  | <input type="radio"/> | <input type="radio"/> | <input type="radio"/> | <input type="radio"/> | <input type="radio"/> |
| Non-Governmental Organization (NGO, e.g., victims' advocacy group, charity)       | <input type="radio"/>  | <input type="radio"/> | <input type="radio"/> | <input type="radio"/> | <input type="radio"/> | <input type="radio"/> |
| Academic center (university laboratory, hospital)                                 | <input type="radio"/>  | <input type="radio"/> | <input type="radio"/> | <input type="radio"/> | <input type="radio"/> | <input type="radio"/> |

To what extent do you agree or disagree with the following statements with regard to

the discussed DNA program?

|                                                                                                  | Strongly Agree        | Agree                 | Neither Agree nor Disagree | Disagree              | Strongly Disagree     |
|--------------------------------------------------------------------------------------------------|-----------------------|-----------------------|----------------------------|-----------------------|-----------------------|
| It is my duty to encourage participation in order for human trafficking victims to be identified | <input type="radio"/> | <input type="radio"/> | <input type="radio"/>      | <input type="radio"/> | <input type="radio"/> |
| I fear that the DNA would be used against the victim or family                                   | <input type="radio"/> | <input type="radio"/> | <input type="radio"/>      | <input type="radio"/> | <input type="radio"/> |
| I trust that a child's DNA would be protected from misuse                                        | <input type="radio"/> | <input type="radio"/> | <input type="radio"/>      | <input type="radio"/> | <input type="radio"/> |

### Sex Trafficking Scenario

In Texas, the High Risk Potential Victims DNA Database is a voluntary DNA collection program for sex workers completing a prostitute diversion program run by the local police department in partnership with social services. DNA samples from consenting individuals are collected and stored in a repository at a local university.

The program is intended to assist with post-mortem identification of sex workers likely to be victims of serial crime in Texas. Samples remain unprocessed until law enforcement suspects that a violent crime, homicide, or missing persons case may be connected to an individual sampled.

A database of DNA profiles from sex workers also could be useful for identifying missing persons and victims of human trafficking if a second sample were collected for comparison to the nation-wide missing persons database.

If such a program were to be offered to a sex worker in your care, would you recommend he or she provide DNA?

|                                                                         | Definitely yes        | Probably yes          | Probably not          | Definitely not        |
|-------------------------------------------------------------------------|-----------------------|-----------------------|-----------------------|-----------------------|
| DNA sample collection for post-mortem identification                    | <input type="radio"/> | <input type="radio"/> | <input type="radio"/> | <input type="radio"/> |
| DNA profiling and databasing for post-mortem identification             | <input type="radio"/> | <input type="radio"/> | <input type="radio"/> | <input type="radio"/> |
| DNA profiling and databasing for comparison to missing persons database | <input type="radio"/> | <input type="radio"/> | <input type="radio"/> | <input type="radio"/> |

Who do you see as the primary intended beneficiary of this program?

- Texas-based law enforcement
- Families of sex workers in Texas
- Sex workers in Texas
- Other

What concerns would you have about participation?

What would motivate you to encourage or discourage participation?

If such a program were to be offered, who would you trust to **HOLD** the DNA specimens and **USE** the DNA profiles (only relaying identity)?

|                                                                             | HOLD the DNA specimens |                       |                       | USE the DNA profiles  |                       |                       |
|-----------------------------------------------------------------------------|------------------------|-----------------------|-----------------------|-----------------------|-----------------------|-----------------------|
|                                                                             | Yes                    | Maybe                 | No                    | Yes                   | Maybe                 | No                    |
| Academic center (university laboratory, hospital)                           | <input type="radio"/>  | <input type="radio"/> | <input type="radio"/> | <input type="radio"/> | <input type="radio"/> | <input type="radio"/> |
| US-based government organization (e.g., national missing persons database)  | <input type="radio"/>  | <input type="radio"/> | <input type="radio"/> | <input type="radio"/> | <input type="radio"/> | <input type="radio"/> |
| Non-Governmental Organization (NGO, e.g., victims' advocacy group, charity) | <input type="radio"/>  | <input type="radio"/> | <input type="radio"/> | <input type="radio"/> | <input type="radio"/> | <input type="radio"/> |
| Texas law enforcement (e.g., police, crime laboratory)                      | <input type="radio"/>  | <input type="radio"/> | <input type="radio"/> | <input type="radio"/> | <input type="radio"/> | <input type="radio"/> |

To what extent do you agree or disagree with the following statements with regard to the discussed DNA program?

|                                                                                                  | Strongly Agree        | Agree                 | Neither Agree nor Disagree | Disagree              | Strongly Disagree     |
|--------------------------------------------------------------------------------------------------|-----------------------|-----------------------|----------------------------|-----------------------|-----------------------|
| I trust that the DNA would be protected from misuse                                              | <input type="radio"/> | <input type="radio"/> | <input type="radio"/>      | <input type="radio"/> | <input type="radio"/> |
| Law enforcement is using this program to gain access to victims' DNA                             | <input type="radio"/> | <input type="radio"/> | <input type="radio"/>      | <input type="radio"/> | <input type="radio"/> |
| It is my duty to encourage participation in order for human trafficking victims to be identified | <input type="radio"/> | <input type="radio"/> | <input type="radio"/>      | <input type="radio"/> | <input type="radio"/> |
| Law enforcement is finally treating sex workers as victims rather than criminals                 | <input type="radio"/> | <input type="radio"/> | <input type="radio"/>      | <input type="radio"/> | <input type="radio"/> |
| I fear that the DNA would be used against the victim or family                                   | <input type="radio"/> | <input type="radio"/> | <input type="radio"/>      | <input type="radio"/> | <input type="radio"/> |

**Final**

What concerns do you have about the use of DNA for law enforcement, immigration and/or human trafficking?

What benefits are there to using DNA for law enforcement, immigration and/or human trafficking?

We thank you for your thoughtful contribution to this research and your time to complete this survey.

On the next screen you will be redirected to a separate site where you may opt to provide your contact information for inclusion in a drawing for a Target gift card.

You may address any questions or thoughts to the principal investigator, Sara Katsanis, at [sara.katsanis@duke.edu](mailto:sara.katsanis@duke.edu)
